# Supplementary material for: In situ structure of actin remodeling during glucose-stimulated insulin secretion using cryo-electron tomography
Source: Research Square preprint supplement (doi:10.21203/rs.3.rs-2694866/v1), 2023-04-04
Supplement: Supplementary file 1 [file 8da38dec440ae23f7ff10ef9.pdf]

# Supplementary Information

**Supplementary Video 1 Biphasic insulin secretion during glucose-stimulated insulin secretion (GSIS) in INS-1E  $\beta$ -cells using total internal reflection fluorescence (TIRF) microscopy.** The green and red fluorescence represent actin filaments and insulin vesicles, respectively. TIRF microscopy was employed to observe the basal membrane, whose thickness is approximately 120 nm. High glucose stimulation was started at 55 seconds, and samples were collected over a total of 40 minutes. Scale bar: 5  $\mu$ m.

**Supplementary Video 2 Slice and segment tomograms obtained from the cell periphery under 2.8 Glu - 30 min conditions.** Each organelle is labeled with a unique color, including actin filaments (orange), microtubules (violet), insulin secretory granules (blue), endoplasmic reticulum (ER; green), lysosomes (silver), and ribosomes (white).

**Supplementary Video 3 Slice and segment tomograms obtained from the cell periphery under 16.7 Glu - 5 min conditions.** Each organelle is labeled with a unique color, including actin filaments (orange), microtubules (violet), insulin secretory granules (blue), ER (green), lysosomes (silver), and ribosomes (white).

**Supplementary Video 4 Slice and segment tomograms obtained from the cell periphery under 16.7 Glu - 30 min conditions.** Each organelle is labeled with a unique color, including actin filaments (orange), microtubules (violet), insulin secretory granules (blue), ER (green), lysosomes (silver), and ribosomes (white).

**Supplementary Video 5 Slice and segment tomograms obtained from the cell interior under 2.8 Glu - 30 min conditions.** Each organelle is labeled with a unique color, including actin filaments (orange), MTs (violet), ISGs (blue), ER (green), mitochondria (red), lysosomes (silver), and ribosomes (white).

**Supplementary Video 6 Slice and segment tomograms obtained from the cell interior under 16.7 Glu - 5 min conditions.** Each organelle is labeled with a unique color, including actin filaments (orange), MTs (violet), ISGs (blue), ER (green), mitochondria (red), lysosomes (silver), and ribosomes (white).

**Supplementary Video 7 Slice and segment tomograms obtained from the cell interior under 16.7 Glu - 30 min conditions.** Each organelle is labeled with a unique color, including actin filaments (orange), MTs (violet), ISGs (blue), ER (green), mitochondria (red), lysosomes (silver), and ribosomes (white).

**Supplementary Table 1. Number of tomograms under each condition**

|                      |                                                          |                                                             |                                                           |
|----------------------|----------------------------------------------------------|-------------------------------------------------------------|-----------------------------------------------------------|
|                      | 2.8 Glu - 30 min                                         | 16.7 Glu - 5 min                                            | 16.7 Glu - 30 min                                         |
| Cell periphery       | Eight tomos (four cells from two grids) / Titan Krios G2 | Eight tomos (seven cells from three grids) / Titan Krios G4 | Eight tomos (five cells from three grids) /Titan Krios G2 |
| Interior of the cell | Six tomos (six cells from two grids) / Titan Krios G4    | Six tomos (six cells from two grids) / Titan Krios G4       | Six tomos (six cells from two grids) / Titan Krios G4     |

**Supplementary Table 2. Data acquisition parameters**

|                                            |                                          |                                                                                      |
|--------------------------------------------|------------------------------------------|--------------------------------------------------------------------------------------|
|                                            | Titan Krios G2                           | Titan Krios G4                                                                       |
| Magnification                              | 26,000                                   | 42,000                                                                               |
| Voltage (KV)                               | 300                                      |                                                                                      |
| Electron exposure (e-/Å <sup>2</sup> )     | ~110-130                                 |                                                                                      |
| Detector                                   | Gatan K3                                 | Falcon4                                                                              |
| Energy filter                              | Yes                                      | Yes                                                                                  |
| Slit width                                 | 20                                       | 20                                                                                   |
| Phase plate                                | No                                       | No                                                                                   |
| Defocus range (µm)                         | -5 to -7                                 | -3 to -4                                                                             |
| Tilt range (min/max, starting angle, step) | -60° to +60°, start from 0°, 2° per step | -60° to +60°, start from 0°, 2° per step, -70° to +50°, start from -10°, 2° per step |
| Tilt scheme                                | Dose-symmetric                           |                                                                                      |
| Pixel size (Å)                             | 3.353                                    | 3.028                                                                                |
| Tomograms (no.)                            | 16                                       | 26                                                                                   |
| Cell (no.)                                 | 9                                        | 25                                                                                   |
